# Supplementary material for: Signal sequences target enzymes and structural proteins to bacterial microcompartments and are critical for microcompartment formation
Source: PubMed Central journal article supplement — bioRxiv. 2024 Sep 25:2024.09.25.615066. Preprint. [Version 1] doi: 10.1101/2024.09.25.615066 (PMC11463388; doi:10.1101/2024.09.25.615066), 2024-09-25
Supplement: media-1.pdf [file media-1.pdf]

**Supplementary Information**

**Signal sequences target enzymes and structural proteins to bacterial microcompartments and are critical for microcompartment formation**

Johnson *et al.*

**Supplementary Table S1.** Strains used in this study.

| Strain Number | Organism                                   | Genotype                                                                                                                                  | Abbreviation        |
|---------------|--------------------------------------------|-------------------------------------------------------------------------------------------------------------------------------------------|---------------------|
| DTE003        | <i>S. enterica</i> serovar Typhimurium LT2 | Wild type                                                                                                                                 | WT                  |
| CEMS344       | <i>S. enterica</i> serovar Typhimurium LT2 | $\Delta pduD::pduD^{19-*}$                                                                                                                | $\Delta ssPduD$     |
| CEMS361       | <i>S. enterica</i> serovar Typhimurium LT2 | $\Delta pduP::M-pduP^{18-*}$                                                                                                              | $\Delta ssPduP$     |
| CEMS362       | <i>S. enterica</i> serovar Typhimurium LT2 | $\Delta pduL::pduL^{17-*}$                                                                                                                | $\Delta ssPduL$     |
| CEMS351       | <i>S. enterica</i> serovar Typhimurium LT2 | $\Delta pduD::pduD^{19-*} \Delta pduP::M-pduP^{18-*}$                                                                                     | $\Delta ssPduDP$    |
| ERJ004        | <i>S. enterica</i> serovar Typhimurium LT2 | $\Delta pduD::pduD^{19-*} \Delta pduL::pduL^{17-*}$                                                                                       | $\Delta ssPduDL$    |
| ERJ005        | <i>S. enterica</i> serovar Typhimurium LT2 | $\Delta pduP::M-pduP^{18-*} \Delta pduL::pduL^{17-*}$                                                                                     | $\Delta ssPduPL$    |
| CEMS360       | <i>S. enterica</i> serovar Typhimurium LT2 | $\Delta pduD::pduD^{19-*} \Delta pduP::M-pduP^{18-*} \Delta pduL::pduL^{17-*}$                                                            | $\Delta ssPduDPL$   |
| CMJS256       | <i>S. enterica</i> serovar Typhimurium LT2 | $\Delta pocR$                                                                                                                             | N/A                 |
| CEMS179       | <i>S. enterica</i> serovar Typhimurium LT2 | $\Delta pduB$                                                                                                                             | N/A                 |
| CEMS342       | <i>S. enterica</i> serovar Typhimurium LT2 | $\Delta pduM$                                                                                                                             | N/A                 |
| CEMS375       | <i>S. enterica</i> serovar Typhimurium LT2 | $\Delta pduB::pduB^{\Delta 3-30}$                                                                                                         | $\Delta ssPduB$     |
| ERJ035        | <i>S. enterica</i> serovar Typhimurium LT2 | $\Delta pduM::M-pduM^{23-*}$                                                                                                              | $\Delta ssPduM$     |
| ERJ198        | <i>S. enterica</i> serovar Typhimurium LT2 | $\Delta pduM::M-pduM^{23-*} \Delta pduB::pduB^{\Delta 3-30}$                                                                              | $\Delta ssPduMB$    |
| ERJ116        | <i>S. enterica</i> serovar Typhimurium LT2 | $\Delta pduD::pduD^{19-*} \Delta pduP::M-pduP^{18-*} \Delta pduL::pduL^{17-*} \Delta pduB::pduB^{\Delta 3-30}$                            | $\Delta ssPduDPLB$  |
| ERJ039        | <i>S. enterica</i> serovar Typhimurium LT2 | $\Delta pduD::pduD^{19-*} \Delta pduP::M-pduP^{18-*} \Delta pduL::pduL^{17-*} \Delta pduM::M-pduM^{23-*}$                                 | $\Delta ssPduDPLM$  |
| ERJ117        | <i>S. enterica</i> serovar Typhimurium LT2 | $\Delta pduD::pduD^{19-*} \Delta pduP::M-pduP^{18-*} \Delta pduL::pduL^{17-*} \Delta pduM::M-pduM^{23-*} \Delta pduB::pduB^{\Delta 3-30}$ | $\Delta ssPduDPLMB$ |
| TUC01         | <i>E. coli</i> W3110                       | gal490 pgl $\Delta$ 8 $\lambda$ cl857 $\Delta$ (cro-bioA) int<>cat/sacB                                                                   | N/A                 |

**Supplementary Table S2.** Plasmids used in this study.

| Plasmid number | Description                                                     | Origin                             | Resistance      |
|----------------|-----------------------------------------------------------------|------------------------------------|-----------------|
| CMJ069         | pBAD33t-PduD <sup>1-20</sup> (ssPduD)-SR-GFPmut2                | p15A                               | Chloramphenicol |
| EYK208         | pBAD33t-PduP <sup>1-17</sup> (ssPduP)-SR-GFPmut2                | p15A                               | Chloramphenicol |
| NWKp041        | pBAD33t-PduL <sup>1-20</sup> (ssPduL)-SR-GFPmut2                | p15A                               | Chloramphenicol |
| EYK193         | pBAD-PduG-SR-GFPmut2                                            | p15A                               | Chloramphenicol |
| NWKp043        | pBAD33t-PduO-GS-GFP                                             | p15A                               | Chloramphenicol |
| pBJP017        | pBAD33t-PduM <sup>1-23</sup> (ssPduM)-GFPmut2                   | p15A                               | Chloramphenicol |
| pERJ011        | pBAD33t-PduB <sup>1-37</sup> (ssPduB with linker)-GS-GFPmut2    | p15A                               | Chloramphenicol |
| NWKp048        | pBAD33t-PduA-GS-GFPmut2                                         | p15A                               | Chloramphenicol |
| pCEM100        | pBAD33t-PduE <sup>1-16</sup> (ssPduE)-GS-GFPmut2                | p15A                               | Chloramphenicol |
| pERJ025        | GFPmut2                                                         | p15A                               | Chloramphenicol |
| pERJ012        | pBAD33t-PduB <sup>1-22</sup> (ssPduB without linker)-GS-GFPmut2 | p15A                               | Chloramphenicol |
| pERJ014        | pBAD33t-ssPduE <sup>ΔESMV::RQII</sup> -GS-GFPmut2               | p15A                               | Chloramphenicol |
| pERJ015        | pBAD33t-ssPduE <sup>ΔESMV::QRIV</sup> -GS-GFPmut2               | p15A                               | Chloramphenicol |
| pERJ016        | pBAD33t-ssPduE <sup>ΔESMV::ETLI</sup> -GS-GFPmut2               | p15A                               | Chloramphenicol |
| pERJ017        | pBAD33t-ssPduL <sup>ΔQSTV::ETLI</sup> -GS-GFPmut2               | p15A                               | Chloramphenicol |
| pERJ018        | pBAD33t-ssPduL <sup>ΔQSTV::RQII</sup> -GS-GFPmut2               | p15A                               | Chloramphenicol |
| pERJ019        | pBAD33t-ssPduL <sup>ΔQSTV::QRIV</sup> -GS-GFPmut2               | p15A                               | Chloramphenicol |
| pCEM119        | pBAD33t-PduM-GS-GFPmut2                                         | p15A                               | Chloramphenicol |
| pCEM120        | pBAD33t-M-PduM <sup>24-*</sup> -GS-GFPmut2                      | p15A                               | Chloramphenicol |
| pSIM6          | λ Red system repressed by cl857                                 | pSC101<br><i>repA<sup>ts</sup></i> | Ampicillin      |

**Supplementary Table S3.** Primers used in this study.

| Name    | Purpose                    | Description                                                           | Sequence (5' → 3')                                                    |
|---------|----------------------------|-----------------------------------------------------------------------|-----------------------------------------------------------------------|
| TMDP021 | Sequencing                 | Amplify from upstream of <i>pduD</i> locus (Fwd)                      | ggcaacaggttatcgctgc                                                   |
| TMDP022 | Sequencing                 | Amplify from upstream of <i>pduD</i> locus (Rev)                      | ccctgcaggctgttcatgc                                                   |
| TMDP072 | Sequencing, recombineering | Amplify from upstream of <i>pduD</i> locus (Fwd)                      | catccagaaagccaagctaacc                                                |
| TMDP073 | Sequencing, recombineering | Amplify from upstream of <i>pduD</i> locus (Rev)                      | cgccagcggtttattggtgg                                                  |
| TMDP086 | Sequencing                 | Amplify from upstream of <i>pduP</i> locus (Fwd)                      | tcatttacagggaaaagtggcacc                                              |
| TMDP087 | Sequencing                 | Amplify from upstream of <i>pduP</i> locus (Rev)                      | tgccagaaagccatcg                                                      |
| TMDP088 | Sequencing                 | Amplify from upstream of <i>pduP</i> locus (Fwd)                      | tgtgacctggcggatgc                                                     |
| TMDP089 | Sequencing                 | Amplify from upstream of <i>pduP</i> locus (Rev)                      | tgagagcctgcatttcg                                                     |
| TMDP043 | Sequencing                 | Amplify from upstream of <i>pduL</i> locus (Fwd)                      | tcagctgcaatctgtgtctgg                                                 |
| TMDP044 | Sequencing                 | Amplify from upstream of <i>pduL</i> locus (Rev)                      | cagaacagtgtggacagtcg                                                  |
| TMDP081 | Sequencing                 | Amplify from upstream of <i>pduL</i> locus (Fwd)                      | ctccgtcattgaacctgagc                                                  |
| TMDP082 | Sequencing                 | Amplify from upstream of <i>pduL</i> locus (Rev)                      | tgagctgtacgcggatgc                                                    |
| oCEM187 | Sequencing                 | Amplify from upstream of <i>pduM</i> locus (Fwd)                      | cgagcgccatcatatgctc                                                   |
| oCEM188 | Sequencing                 | Amplify from upstream of <i>pduM</i> locus (Rev)                      | cggtaaacagtgatgtggtgcc                                                |
| oCEM189 | Sequencing                 | Amplify from upstream of <i>pduM</i> locus (Fwd)                      | gatcgcgggctgatttcaaca                                                 |
| oCEM190 | Sequencing                 | Amplify from upstream of <i>pduM</i> locus (Rev)                      | gattttgctggagacaaccg                                                  |
| oMPV029 | Sequencing                 | Amplify from upstream of <i>pduB</i> locus (Fwd)                      | gtgggtgaagtgaaagccgta                                                 |
| oMPV030 | Sequencing                 | Amplify from upstream of <i>pduB</i> locus (Rev)                      | tccatcgccatcacttctctg                                                 |
| oERJ006 | Sequencing, recombineering | Amplify from upstream of <i>pduB</i> locus (Fwd)                      | GAAAGCCGTACACGTCA<br>TCCC                                             |
| oERJ007 | Sequencing, recombineering | Amplify from upstream of <i>pduB</i> locus (Rev)                      | CCTGATTCACAGGGCGT<br>TTCG                                             |
| oCEM159 | Recombineering             | Amplify <i>cat/sacB</i> with homology upstream of <i>pduM</i> (Fwd)   | gccgctggtgccgataaccgcat<br>gcctttgccggctgtagggccgcg<br>gTGTGACGGAAGAT |
| oCEM160 | Recombineering             | Amplify <i>cat/sacB</i> with homology downstream of <i>pduM</i> (Rev) | gattttgctggagacaaccgcg<br>ccgtgactcgtgccagatgcatgat<br>ATCAAAGGGAAAA  |

|         |                        |                                                                                                             |                                                                                                                     |
|---------|------------------------|-------------------------------------------------------------------------------------------------------------|---------------------------------------------------------------------------------------------------------------------|
| oCEM171 | Recombineering         | <i>pduM</i> knockout (Fwd)                                                                                  | ctggtgccgataaccgcgatgccttt<br>gcccggctggtaggcccgcatga<br>aatattcaattaattaagcaggagt<br>aatcatgcatctggcagcagtcac<br>c |
| oCEM172 | Recombineering         | <i>pduM</i> knockout (Rev)                                                                                  | gtgactcgtgccagatgcatgattta<br>ctcctgcttaattaattgaatttcat<br>cgcgggcct                                               |
| TMDP003 | Recombineering         | Amplify <i>cat/sacB</i> with<br>homology upstream of <i>pduP</i><br>(Fwd)                                   | CAGCGTTGAGCAGGAC<br>ATGG                                                                                            |
| TMDP004 | Recombineering         | Amplify <i>cat/sacB</i> with<br>homology downstream of<br><i>pduP</i> (Rev)                                 | CCAGATGTGCTTATTGG<br>TAAAGCGC                                                                                       |
| TMDP023 | Recombineering         | Amplify <i>cat/sacB</i> with<br>homology upstream of <i>pduL</i><br>(Fwd)                                   | aaaatgtccgcgccagaagg                                                                                                |
| TMDP024 | Recombineering         | Amplify <i>cat/sacB</i> with<br>homology downstream of <i>pduL</i><br>(Rev)                                 | cgaagttgcgtaacgctcagc                                                                                               |
| oCEM161 | Recombineering         | Amplify <i>pduD</i> <sup>19-*</sup> with<br>homology upstream of <i>pduD</i><br>(Fwd)                       | aaacatccctggcgctcttgatccc<br>aacgagattgattaaggggtgaga<br>aatgaagggcagcgataaacc                                      |
| oCEM162 | Recombineering         | Amplify <i>pduD</i> <sup>19-*</sup> with<br>homology downstream of<br><i>pduD</i> (Rev)                     | gtcccgaccatcgattcaattgcgt<br>cggattcatggagtatcctttatca<br>aagcgccacgcg                                              |
| oCEM163 | Recombineering         | Amplify <i>pduP</i> <sup>18-*</sup> with<br>homology upstream of <i>pduP</i><br>(Fwd)                       | atggacatagcacagaccgccatc<br>gcggtattaacgtgggaactcatc<br>aatgaataccacgccggcg                                         |
| oCEM164 | Recombineering         | Amplify <i>pduP</i> <sup>18-*</sup> with<br>homology downstream of<br><i>pduP</i> (Rev)                     | accgctgtacaaccgcgtttgtagt<br>gagaaggtattcatcgcgacctca<br>gtagcgaatagaaaagccgttg                                     |
| oCEM165 | Recombineering         | Amplify <i>pduL</i> <sup>17-*</sup> with<br>homology upstream of <i>pduL</i><br>(Fwd)                       | ggcgaacctcgtacgctttgcatca<br>ttccggcaagcgaggtgaagcgta<br>atgcgccagcgg                                               |
| oCEM166 | Recombineering         | Amplify <i>pduL</i> <sup>17-*</sup> with<br>homology downstream of <i>pduL</i><br>(Rev)                     | atgcagccgggagacaatctctc<br>gacaatgcgctgcagggttcggc<br>gttcatcgcgggcct                                               |
| oCEM195 | Recombineering         | Amplify <i>pduB</i> <sup>Δ3-30</sup> with<br>homology upstream of <i>pduB</i><br>(Fwd)                      | gccctcacaccgatgtagaaaaa<br>atcttaccgaaggggaattagccaat<br>gagccaacctatacgagagacgg<br>ctatgg                          |
| NWko512 | Recombineering         | Amplify <i>pduB</i> <sup>Δ3-30</sup> with<br>homology downstream of<br><i>pduB</i> (Rev)                    | ttcgcagtgcttcaaatctttcgcac<br>tcatgaatcagcctcgtgggtAtca<br>gatgtaggacggacgatcgttttcg                                |
| oERJ001 | Golden Gate<br>cloning | Amplify <i>pduB</i> <sup>1-37</sup> and <i>pduB</i> <sup>1-22</sup><br>to add Golden Gate overhang<br>(For) | AGTTACGGTCTCacatgag<br>cagcaatgagctggtg                                                                             |
| oERJ002 | Golden Gate<br>cloning | Amplify <i>pduB</i> <sup>1-37</sup> to add<br>Golden Gate overhang                                          | GTCAACGGTCTCAacca<br>gccgtctcgtataggtggg                                                                            |

|         |                     |                                                                                                                 |                                                                                                                     |
|---------|---------------------|-----------------------------------------------------------------------------------------------------------------|---------------------------------------------------------------------------------------------------------------------|
|         |                     | compatible with GS linker (Rev)                                                                                 |                                                                                                                     |
| oERJ003 | Golden Gate cloning | Amplify <i>pduB</i> <sup>1-22</sup> to add Golden Gate overhang compatible with GS linker (Rev)                 | GTCAACGGTCTCAaacctt ccggcggtgccacacg                                                                                |
| oBJP094 | Golden Gate cloning | Amplify GFPmut2 to add Golden Gate overhang compatible with <i>pduM</i> <sup>1-23</sup> ( <i>ssPduM</i> ) (Fwd) | AttGGTCTCAgagcAgtaaag gagaagaacttttctactgga                                                                         |
| oBJP095 | Golden Gate cloning | Amplify oBJP097 to add Golden Gate overhang (Fwd)                                                               | attaggtctcacatgaacggcgaa accctgcag                                                                                  |
| oBJP096 | Golden Gate cloning | Amplify oBJP097 to add Golden Gate overhang (Rev)                                                               | attaggtctcagctctgggcacggc gatg                                                                                      |
| oBJP097 | Golden Gate cloning | Oligo encoding <i>pduM</i> <sup>1-23</sup> ( <i>ssPduM</i> )                                                    | atgaacggcgaaaccctgcagcg cattgtcaggagattgtctccgg ctgcatgcctgcccagagc                                                 |
| oBJP137 | Golden Gate cloning | Amplify GFPmut2 to add Golden Gate overhang and GS linker (Fwd)                                                 | AttaGGTCTCAggttctAgtaa aggagaagaacttttctactgga                                                                      |
| NWko569 | Golden Gate cloning | Amplify <i>pduA</i> to add Golden Gate overhang (Fwd)                                                           | AttGGTCTCACATGCAAC AAGAAGCACTAGG                                                                                    |
| NWko570 | Golden Gate cloning | Amplify <i>pduA</i> to add Golden Gate overhang and GS linker (Rev)                                             | ATTGGTCTCAGCTGCCtt ggctaattcccttcgg                                                                                 |
| NWko506 | Golden Gate cloning | Amplify GFPmut2 to add Golden Gate overhang compatible with GS linker (Fwd)                                     | AttGGTCTCACAGCAgtaa aggagaagaacttttctactgga                                                                         |
| NWko507 | Golden Gate cloning | Amplify GFPmut2 to add Golden Gate overhang (Rev)                                                               | ATTGGTCTCATTTAttgtat agttcatccatgccatgtg tGGTCTCACatgaataccgac gcaattgaatcgatggtccgggac gtattgagccgcGGCAGCTG AGACCa |
| oCEM207 | Golden Gate cloning | Oligo containing <i>pduE</i> <sup>1-16</sup> ( <i>ssPduE</i> ), GS linker, and Golden Gate overhangs            |                                                                                                                     |
| oCEM208 | Golden Gate cloning | Amplify oCEM207 and oCEM266 - 268 to add buffer regions outside of Bsal cut sites (Fwd)                         | gggtGGTCTCACatga                                                                                                    |
| oCEM209 | Golden Gate cloning | Amplify oCEM207 and oCEM266 - 271 to add buffer regions outside of Bsal cut sites (Rev)                         | gggtGGTCTCAGCTGC                                                                                                    |
| oCEM266 | Golden Gate cloning | Oligo containing <i>ssPduE</i> <sup>ΔESMV::ETLI</sup> , GS linker, and Golden Gate overhangs                    | tGGTCTCACatgaataccgac gcaattGAAACTCTTATTcg ggacgtattgagccgcGGCAG CTGAGACCa                                          |
| oCEM267 | Golden Gate cloning | Oligo containing <i>ssPduE</i> <sup>ΔESMV::QRIV</sup> , GS linker, and Golden Gate overhangs                    | tGGTCTCACatgaataccgac gcaattCAGCGTATTGTAcg                                                                          |

|         |                     |                                                                                                     |                                                                                     |
|---------|---------------------|-----------------------------------------------------------------------------------------------------|-------------------------------------------------------------------------------------|
|         |                     |                                                                                                     | ggacgtattgagccgcGGCAG<br>CTGAGACCa                                                  |
| oCEM268 | Golden Gate cloning | Oligo containing <i>ssPduE</i> <sup>ΔESMV::RQII</sup> , GS linker, and Golden Gate overhangs        | tGGTCTCACatgaataccgac<br>gcaattCGTCAGATTATCcg<br>ggacgtattgagccgcGGCAG<br>CTGAGACCa |
| oCEM265 | Golden Gate cloning | Amplify oCEM269 - 271 to add buffer regions outside of Bsal cut sites (Fwd)                         | gggtGGTCTCACatgg                                                                    |
| oCEM269 | Golden Gate cloning | Oligo containing <i>ssPduL</i> <sup>ΔQSTV::ETLI</sup> , GS linker, and Golden Gate overhangs        | tGGTCTCACatggataaagag<br>cttctgGAAACTCTTATTcgt<br>aaagttctcgacgagGGCAGC<br>TGAGACCa |
| oCEM270 | Golden Gate cloning | Oligo containing <i>ssPduL</i> <sup>ΔQSTV::QRIV</sup> , GS linker, and Golden Gate overhangs        | tGGTCTCACatggataaagag<br>cttctgCAGCGTATTGTAcgt<br>aaagttctcgacgagGGCAGC<br>TGAGACCa |
| oCEM271 | Golden Gate cloning | Oligo containing <i>ssPduL</i> <sup>ΔQSTV::RQII</sup> , GS linker, and Golden Gate overhangs        | tGGTCTCACatggataaagag<br>cttctgCGTCAGATTATCcg<br>aaagttctcgacgagGGCAGC<br>TGAGACCa  |
| oCEM240 | Golden Gate cloning | Amplify <i>pduM</i> to add Golden Gate overhang (Fwd)                                               | AttGGTCTCACATGAACG<br>GCGAAACCCTG                                                   |
| oCEM241 | Golden Gate cloning | Amplify <i>pduM</i> and <i>pduM</i> <sup>24-*</sup> to add Golden Gate overhang and GS linker (Rev) | ATTGGTCTCAGCTGCCct<br>cctgcttaattaattgaatattccg                                     |
| oCEM242 | Golden Gate cloning | Amplify <i>pduM</i> <sup>24-*</sup> to add Golden Gate overhang (Fwd)                               | AttGGTCTCACATGACGG<br>CGACGCTGAG                                                    |

**Supplementary Table S4.** Number of cells counted per replicate for the puncta counts shown in Figures 3b, 4b, and 5b.

| Genotype       | Reporter   | Cells Counted per Replicate |     |     |       |
|----------------|------------|-----------------------------|-----|-----|-------|
|                |            | 1                           | 2   | 3   | Total |
| WT             | ssPduD-GFP | 78                          | 69  | 84  | 231   |
| WT             | ssPduP-GFP | 113                         | 79  | 66  | 258   |
| WT             | ssPduL-GFP | 72                          | 142 | 58  | 272   |
| WT             | PduG-GFP   | 93                          | 166 | 106 | 365   |
| WT             | PduO-GFP   | 160                         | 169 | 116 | 445   |
| WT             | ssPduM-GFP | 211                         | 68  | 90  | 369   |
| WT             | PduA-GFP   | 72                          | 66  | 59  | 197   |
| <i>ΔssPduD</i> | ssPduD-GFP | 69                          | 92  | 112 | 273   |
| <i>ΔssPduD</i> | ssPduP-GFP | 86                          | 90  | 103 | 279   |
| <i>ΔssPduD</i> | ssPduL-GFP | 82                          | 70  | 139 | 291   |
| <i>ΔssPduD</i> | PduG-GFP   | 85                          | 71  | 47  | 203   |
| <i>ΔssPduD</i> | PduO-GFP   | 115                         | 118 | 124 | 357   |
| <i>ΔssPduD</i> | PduA-GFP   | 96                          | 95  | 73  | 264   |

|                  |            |     |     |     |     |
|------------------|------------|-----|-----|-----|-----|
| <i>ΔssPduP</i>   | ssPduD-GFP | 45  | 99  | 88  | 232 |
| <i>ΔssPduP</i>   | ssPduP-GFP | 88  | 88  | 74  | 250 |
| <i>ΔssPduP</i>   | ssPduL-GFP | 82  | 130 | 147 | 359 |
| <i>ΔssPduP</i>   | PduG-GFP   | 110 | 118 | 92  | 320 |
| <i>ΔssPduP</i>   | PduO-GFP   | 142 | 65  | 91  | 298 |
| <i>ΔssPduP</i>   | PduA-GFP   | 139 | 44  | 92  | 275 |
| <i>ΔssPduL</i>   | ssPduD-GFP | 77  | 84  | 146 | 307 |
| <i>ΔssPduL</i>   | ssPduP-GFP | 72  | 72  | 126 | 270 |
| <i>ΔssPduL</i>   | ssPduL-GFP | 94  | 82  | 76  | 252 |
| <i>ΔssPduL</i>   | PduG-GFP   | 57  | 59  | 84  | 200 |
| <i>ΔssPduL</i>   | PduO-GFP   | 112 | 73  | 88  | 273 |
| <i>ΔssPduL</i>   | PduA-GFP   | 143 | 155 | 122 | 420 |
| <i>ΔssPduDP</i>  | ssPduD-GFP | 77  | 105 | 66  | 248 |
| <i>ΔssPduDP</i>  | ssPduP-GFP | 71  | 117 | 117 | 305 |
| <i>ΔssPduDP</i>  | ssPduL-GFP | 100 | 120 | 157 | 377 |
| <i>ΔssPduDP</i>  | PduG-GFP   | 67  | 56  | 146 | 269 |
| <i>ΔssPduDP</i>  | PduO-GFP   | 70  | 131 | 124 | 325 |
| <i>ΔssPduDP</i>  | PduA-GFP   | 163 | 66  | 59  | 288 |
| <i>ΔssPduDL</i>  | ssPduD-GFP | 132 | 69  | 64  | 265 |
| <i>ΔssPduDL</i>  | ssPduP-GFP | 83  | 74  | 148 | 305 |
| <i>ΔssPduDL</i>  | ssPduL-GFP | 88  | 101 | 86  | 275 |
| <i>ΔssPduDL</i>  | PduG-GFP   | 91  | 173 | 83  | 347 |
| <i>ΔssPduDL</i>  | PduO-GFP   | 81  | 110 | 115 | 306 |
| <i>ΔssPduDL</i>  | PduA-GFP   | 188 | 94  | 72  | 354 |
| <i>ΔssPduPL</i>  | ssPduD-GFP | 74  | 97  | 114 | 285 |
| <i>ΔssPduPL</i>  | ssPduP-GFP | 92  | 93  | 138 | 323 |
| <i>ΔssPduPL</i>  | ssPduL-GFP | 105 | 62  | 76  | 243 |
| <i>ΔssPduPL</i>  | PduG-GFP   | 75  | 136 | 99  | 310 |
| <i>ΔssPduPL</i>  | PduO-GFP   | 70  | 65  | 96  | 231 |
| <i>ΔssPduPL</i>  | PduA-GFP   | 130 | 127 | 113 | 370 |
| <i>ΔssPduDPL</i> | ssPduD-GFP | 115 | 89  | 113 | 317 |
| <i>ΔssPduDPL</i> | ssPduP-GFP | 79  | 73  | 119 | 271 |
| <i>ΔssPduDPL</i> | ssPduL-GFP | 100 | 93  | 57  | 250 |
| <i>ΔssPduDPL</i> | PduG-GFP   | 95  | 54  | 98  | 247 |
| <i>ΔssPduDPL</i> | PduO-GFP   | 99  | 81  | 134 | 314 |
| <i>ΔssPduDPL</i> | PduA-GFP   | 104 | 108 | 61  | 273 |
| <i>ΔpduB</i>     | ssPduD-GFP | 135 | 214 | 275 | 624 |
| <i>ΔpduB</i>     | ssPduM-GFP | 43  | 104 | 111 | 258 |
| <i>ΔpduB</i>     | PduG-GFP   | 232 | 311 | 233 | 776 |
| <i>ΔpduB</i>     | PduA-GFP   | 40  | 33  | 179 | 252 |
| <i>ΔssPduB</i>   | ssPduD-GFP | 110 | 60  | 172 | 342 |
| <i>ΔssPduB</i>   | ssPduM-GFP | 268 | 108 | 108 | 484 |
| <i>ΔssPduB</i>   | PduG-GFP   | 166 | 53  | 57  | 276 |
| <i>ΔssPduB</i>   | PduA-GFP   | 82  | 124 | 137 | 343 |
| <i>ΔpduM</i>     | ssPduD-GFP | 231 | 205 | 216 | 652 |



|                     |            |     |     |     |     |
|---------------------|------------|-----|-----|-----|-----|
| $\Delta pduM$       | ssPduM-GFP | 129 | 168 | 221 | 518 |
| $\Delta pduM$       | PduG-GFP   | 159 | 167 | 157 | 483 |
| $\Delta pduM$       | PduA-GFP   | 149 | 111 | 60  | 320 |
| $\Delta ssPduM$     | ssPduD-GFP | 96  | 42  | 108 | 246 |
| $\Delta ssPduM$     | ssPduM-GFP | 80  | 92  | 178 | 350 |
| $\Delta ssPduM$     | PduG-GFP   | 238 | 119 | 136 | 493 |
| $\Delta ssPduM$     | PduA-GFP   | 33  | 50  | 58  | 141 |
| $\Delta ssPduMB$    | ssPduD-GFP | 55  | 76  | 100 | 231 |
| $\Delta ssPduMB$    | ssPduM-GFP | 152 | 52  | 109 | 313 |
| $\Delta ssPduMB$    | PduG-GFP   | 81  | 159 | 55  | 295 |
| $\Delta ssPduMB$    | PduA-GFP   | 68  | 46  | 106 | 220 |
| $\Delta ssPduDPLB$  | ssPduD-GFP | 79  | 72  | 127 | 278 |
| $\Delta ssPduDPLB$  | ssPduM-GFP | 37  | 113 | 47  | 197 |
| $\Delta ssPduDPLB$  | PduG-GFP   | 80  | 84  | 93  | 257 |
| $\Delta ssPduDPLB$  | PduA-GFP   | 59  | 46  | 54  | 159 |
| $\Delta ssPduDPLM$  | ssPduD-GFP | 103 | 109 | 82  | 294 |
| $\Delta ssPduDPLM$  | ssPduM-GFP | 90  | 45  | 91  | 226 |
| $\Delta ssPduDPLM$  | PduG-GFP   | 230 | 93  | 161 | 484 |
| $\Delta ssPduDPLM$  | PduA-GFP   | 108 | 97  | 88  | 293 |
| $\Delta ssPduDPLMB$ | ssPduD-GFP | 58  | 131 | 132 | 321 |
| $\Delta ssPduDPLMB$ | ssPduM-GFP | 73  | 117 | 88  | 278 |
| $\Delta ssPduDPLMB$ | PduG-GFP   | 105 | 140 | 163 | 408 |
| $\Delta ssPduDPLMB$ | PduA-GFP   | 86  | 178 | 208 | 472 |

**Supplementary Table S5.** Designs and results of statistical tests conducted in this study.

| Test description                                        | One-factor ANOVA between puncta counts of core reporters expressed in a strain, Bonferroni post-hoc test |
|---------------------------------------------------------|----------------------------------------------------------------------------------------------------------|
| Reporters included in test                              | ssPduD-GFP, ssPduP-GFP, ssPduL-GFP, PduG-GFP, PduO-GFP                                                   |
| <i>F</i> statistic and <i>p</i> value, $\Delta ssPduD$  | $F = 129.08, p = 1.462 \times 10^{-8}$                                                                   |
| <i>F</i> statistic and <i>p</i> value, $\Delta ssPduP$  | $F = 9.41, p = 0.0020$                                                                                   |
| <i>F</i> statistic and <i>p</i> value, $\Delta ssPduL$  | $F = 7.67, p = 0.0043$                                                                                   |
| <i>F</i> statistic and <i>p</i> value, $\Delta ssPduDP$ | $F = 183.13, p = 2.628 \times 10^{-9}$                                                                   |
| <i>F</i> statistic and <i>p</i> value, $\Delta ssPduDL$ | $F = 104.58, p = 4.080 \times 10^{-8}$                                                                   |
| <i>F</i> statistic and <i>p</i> value, $\Delta ssPduPL$ | $F = 4.18, p = 0.0303$                                                                                   |

|                                                               |                                                                                                                                                          |
|---------------------------------------------------------------|----------------------------------------------------------------------------------------------------------------------------------------------------------|
| <i>F</i> statistic and <i>p</i> value,<br>$\Delta ssPduDPL$   | $F = 27.41, p = 2.278 \times 10^{-5}$                                                                                                                    |
| Total degrees of freedom                                      | 14 (Between groups df = 4, within groups df = 10)                                                                                                        |
| Test description                                              | One-factor ANOVA between puncta counts of different reporters expressed in a strain, Dunnett post-hoc test                                               |
| Control group                                                 | PduA-GFP                                                                                                                                                 |
| Experimental groups                                           | ssPduD-GFP, ssPduM-GFP, PduG-GFP                                                                                                                         |
| <i>F</i> statistic and <i>p</i> value,<br>$\Delta pduM$       | $F = 21.94, p = 3.25 \times 10^{-4}$                                                                                                                     |
| <i>F</i> statistic and <i>p</i> value,<br>$\Delta ssPduM$     | $F = 25.15, p = 2.00 \times 10^{-4}$                                                                                                                     |
| <i>F</i> statistic and <i>p</i> value,<br>$\Delta ssPduDPLB$  | $F = 37.37, p = 4.71 \times 10^{-5}$                                                                                                                     |
| <i>F</i> statistic and <i>p</i> value,<br>$\Delta ssPduDPLMB$ | $F = 36.12, p = 5.35 \times 10^{-5}$                                                                                                                     |
| Total degrees of freedom                                      | 11 (Between groups df = 3, within groups df = 8)                                                                                                         |
| Control group                                                 | ssPduD-GFP                                                                                                                                               |
| Experimental groups                                           | ssPduM-GFP, PduG-GFP                                                                                                                                     |
| <i>F</i> statistic and <i>p</i> value,<br>$\Delta ssPduDPLB$  | $F = 0.38, p = 0.70$                                                                                                                                     |
| <i>F</i> statistic and <i>p</i> value,<br>$\Delta ssPduDPLM$  | $F = 0.76, p = 0.51$                                                                                                                                     |
| <i>F</i> statistic and <i>p</i> value,<br>$\Delta ssPduDPLMB$ | $F = 1.62, p = 0.27$                                                                                                                                     |
| Total degrees of freedom                                      | 8 (Between groups df = 2, within groups df = 6)                                                                                                          |
| Test description                                              | One-factor ANOVA between puncta counts of PduA-GFP expressed in different strains, Bonferroni post-hoc test                                              |
| Strains included in test                                      | WT, $\Delta pduB$ , $\Delta ssPduB$ , $\Delta pduM$ , $\Delta ssPduM$ , $\Delta ssPduMB$ , $\Delta ssPduDPLB$ , $\Delta ssPduDPLM$ , $\Delta ssPduDPLMB$ |
| <i>F</i> statistic and <i>p</i> value                         | $F = 26.32, p = 2.06 \times 10^{-8}$                                                                                                                     |
| Total degrees of freedom                                      | 26 (Between groups df = 8, within groups df = 18)                                                                                                        |
| Test description                                              | Two-factor ANOVA between puncta counts of reporters expressed in two strains                                                                             |
| Strains included in test                                      | $\Delta ssPduM$ , $\Delta pduM$                                                                                                                          |
| Reporters included in test                                    | ssPduD-GFP, ssPduM-GFP, PduG-GFP, PduA-GFP                                                                                                               |
| <i>F</i> statistic and <i>p</i> value,<br>strains             | $F = 38.96, p = 1.18 \times 10^{-5}$                                                                                                                     |
| <i>F</i> statistic and <i>p</i> value,<br>reporters           | $F = 38.24, p = 1.59 \times 10^{-7}$                                                                                                                     |

---

|                                                            |                                                                                                     |
|------------------------------------------------------------|-----------------------------------------------------------------------------------------------------|
| <i>F</i> statistic and <i>p</i> value,<br>interaction      | $F = 7.17, p = 0.0029$                                                                              |
| Total degrees of freedom                                   | 23 (Between strains df = 1, between reporters df = 3, interaction<br>df = 3, within groups df = 16) |
| Simple main effects test<br>description                    | Two-tailed Student's <i>t</i> -test between strains for each reporter                               |
| <i>t</i> statistic and <i>p</i> value,<br>ssPduD-GFP       | $t = 12.31, p = 2.50 \times 10^{-4}$                                                                |
| <i>t</i> statistic and <i>p</i> value,<br>ssPduM-GFP       | $t = 2.21, p = 0.091$                                                                               |
| <i>t</i> statistic and <i>p</i> value,<br>PduG-GFP         | $t = 0.76, p = 0.49$                                                                                |
| <i>t</i> statistic and <i>p</i> value,<br>PduA-GFP         | $t = 3.06, p = 0.0376$                                                                              |
| Degrees of freedom,<br>simple main effects <i>t</i> -tests | 4                                                                                                   |

---

**Supplementary Table S6.** Bonferroni post hoc test from ANOVA used in Figure 3b. This table shows pairwise  $p$ -values between normalized puncta counts of enzymatic signal sequences and other core reporters in enzymatic signal sequence knockout strains.

| Reporter 1 | Reporter 2 | $p, \Delta ssD$       | $p, \Delta ssP$       | $p, \Delta ssL$ | $p, \Delta ssDP$      | $p, \Delta ssDL$      | $p, \Delta ssPL$ | $p, \Delta ssDPL$     |
|------------|------------|-----------------------|-----------------------|-----------------|-----------------------|-----------------------|------------------|-----------------------|
| ssPduD-GFP | ssPduP-GFP | $8.65 \times 10^{-7}$ | 1                     | 1               | $2.01 \times 10^{-7}$ | $1.33 \times 10^{-7}$ | 1                | $6.84 \times 10^{-5}$ |
| ssPduD-GFP | ssPduL-GFP | $8.14 \times 10^{-7}$ | 1                     | 0.3579          | $8.76 \times 10^{-9}$ | $1.56 \times 10^{-6}$ | 0.130            | $6.25 \times 10^{-3}$ |
| ssPduD-GFP | PduG-GFP   | $2.32 \times 10^{-8}$ | 1                     | 1               | $9.16 \times 10^{-9}$ | $6.03 \times 10^{-8}$ | 1                | $2.85 \times 10^{-5}$ |
| ssPduD-GFP | PduO-GFP   | $2.77 \times 10^{-8}$ | $4.41 \times 10^{-3}$ | 0.1545          | $6.75 \times 10^{-9}$ | $3.57 \times 10^{-7}$ | 1                | $4.54 \times 10^{-3}$ |
| ssPduP-GFP | ssPduL-GFP | 1                     | 1                     | 0.0320          | $1.28 \times 10^{-3}$ | 0.0379                | 1                | 0.0477                |
| ssPduP-GFP | PduG-GFP   | $1.03 \times 10^{-3}$ | 1                     | 1               | $1.46 \times 10^{-3}$ | 1                     | 1                | 1                     |
| ssPduP-GFP | PduO-GFP   | $1.64 \times 10^{-3}$ | $6.93 \times 10^{-3}$ | 0.0146          | $5.96 \times 10^{-4}$ | 1                     | 0.429            | 0.0687                |
| ssPduL-GFP | PduG-GFP   | $1.15 \times 10^{-3}$ | 1                     | 0.0795          | 1                     | $4.24 \times 10^{-3}$ | 0.6156           | 0.0118                |
| ssPduL-GFP | PduO-GFP   | $1.85 \times 10^{-3}$ | 0.0322                | 1               | 1                     | 0.582                 | 0.0393           | 1                     |
| PduG-GFP   | PduO-GFP   | 1                     | $5.07 \times 10^{-3}$ | 0.0352          | 1                     | 0.1284                | 1                | 0.0166                |

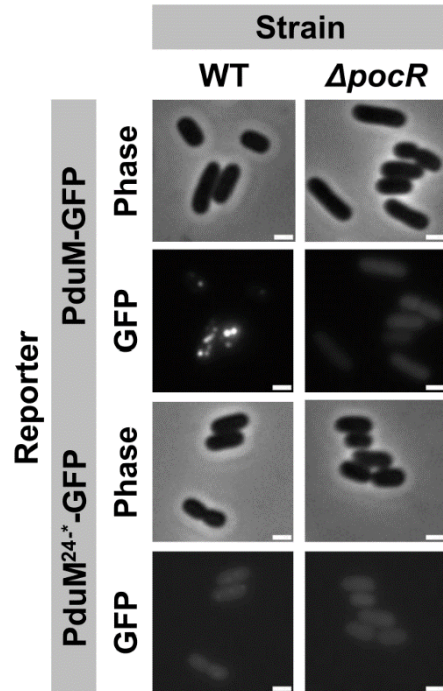

**Supplementary Figure S1.** Optical and fluorescence micrographs of full length PduM and PduM<sup>24\*</sup> (PduM without its signal sequence) fused to GFPmut2. These constructs were overexpressed both in wild-type (WT) MCP-forming *S. enterica* and in  $\Delta pocR$ , an assembly-deficient *S. enterica* strain in which all MCP formation is abolished. All scale bars are 1  $\mu\text{m}$ . Similar results were observed across at least three biological replicates of each strain.

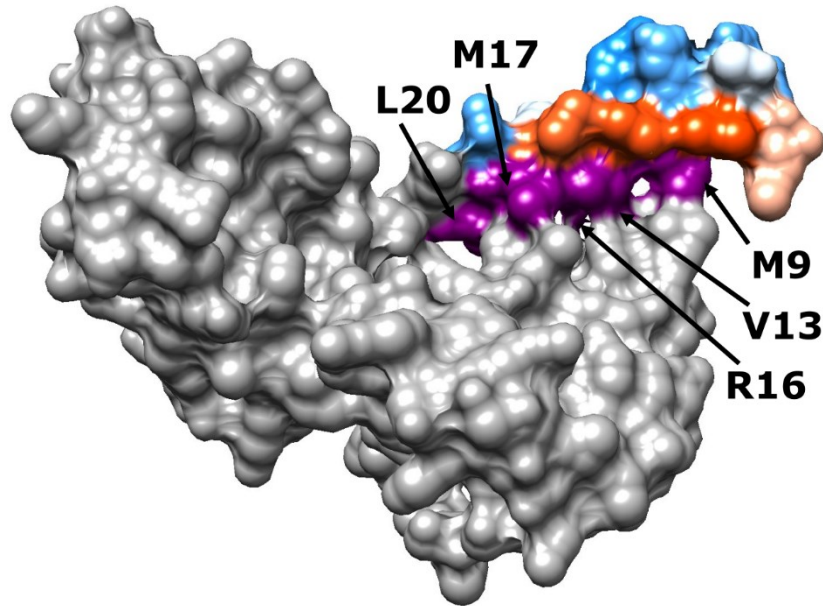

**Supplementary Figure S2.** Predicted hydrophobicity surface of PduE from *S. enterica* LT2. The body of PduE is colored gray, and the signal sequence-like N-terminal motif (ssPduE) is colored in blue, red, and purple. Hydrophilic areas are shown in blue, hydrophobic areas are shown in red, and residues that are predicted to connect ssPduE to the body of PduE are shown in purple and labeled with arrows. This structure was downloaded from the AlphaFold Protein Structure Database and visualized using UCSF Chimera.<sup>1-3</sup>

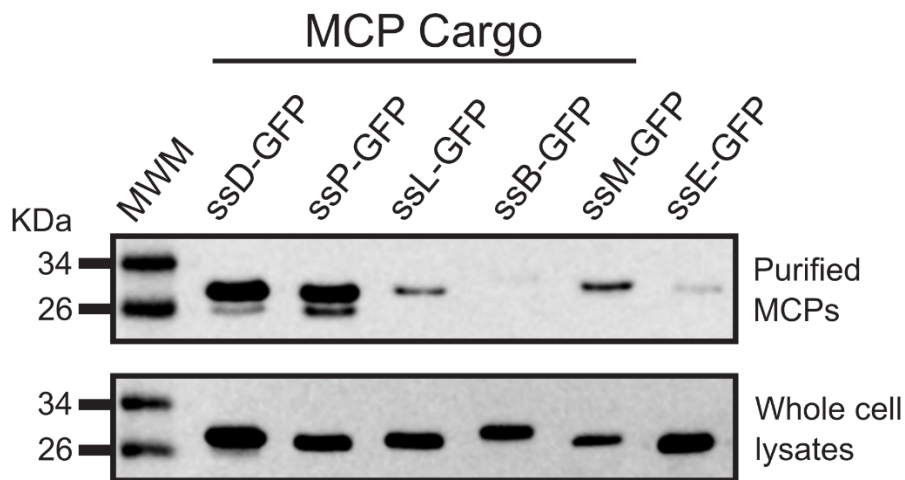

**Supplementary Figure S3.** Anti-GFP western blots of purified MCPs and whole cell lysates from wild-type *Salmonella enterica* overexpressing each signal sequence fused to GFPmut2. Similar results were observed across two independent biological replicates.

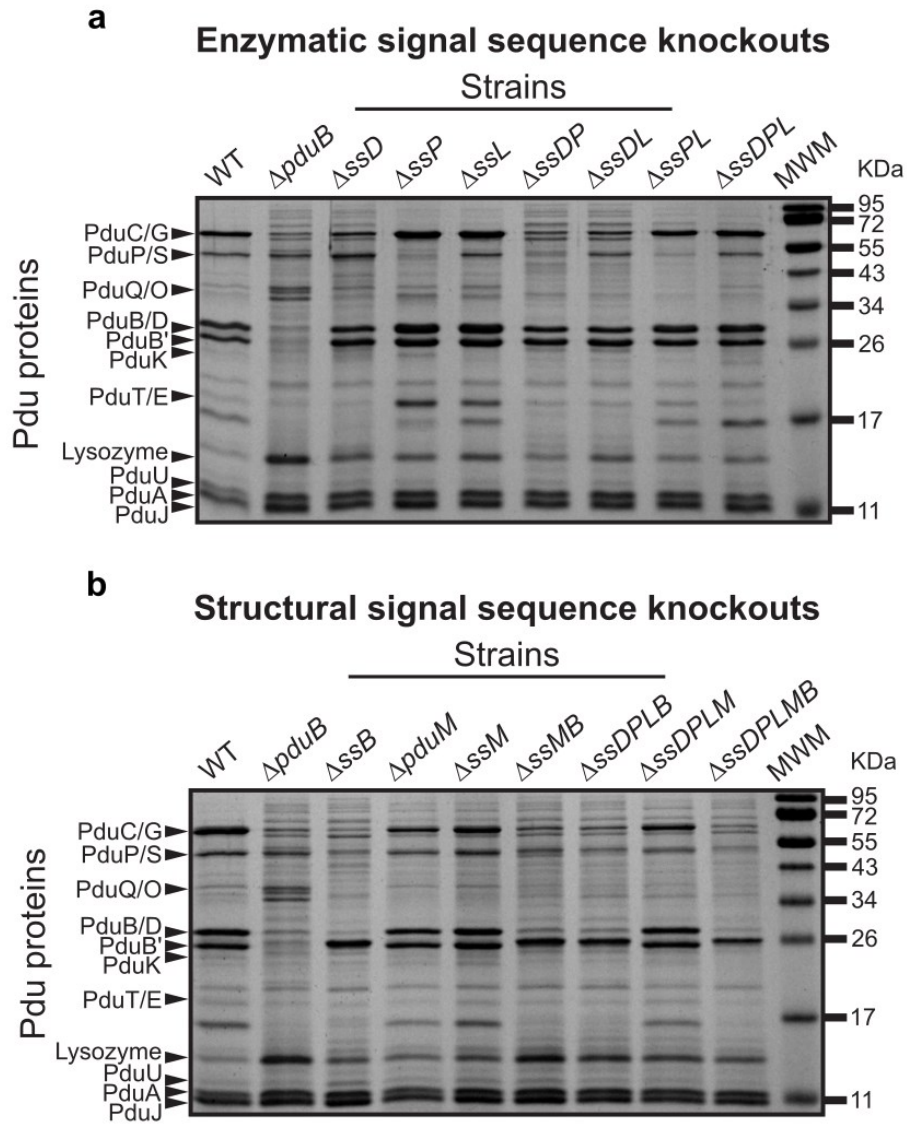

**Supplementary Figure S4.** Coomassie stained SDS-PAGE of MCPs purified from (a) enzymatic signal sequence knockout strains and (b) structural and structural + enzymatic signal sequence knockout strains. Bands corresponding to various Pdu proteins and lysozyme are labeled, and molecular weight markers (MWM) are included on the right side of the gels. Similar results were observed across three technical replicates.

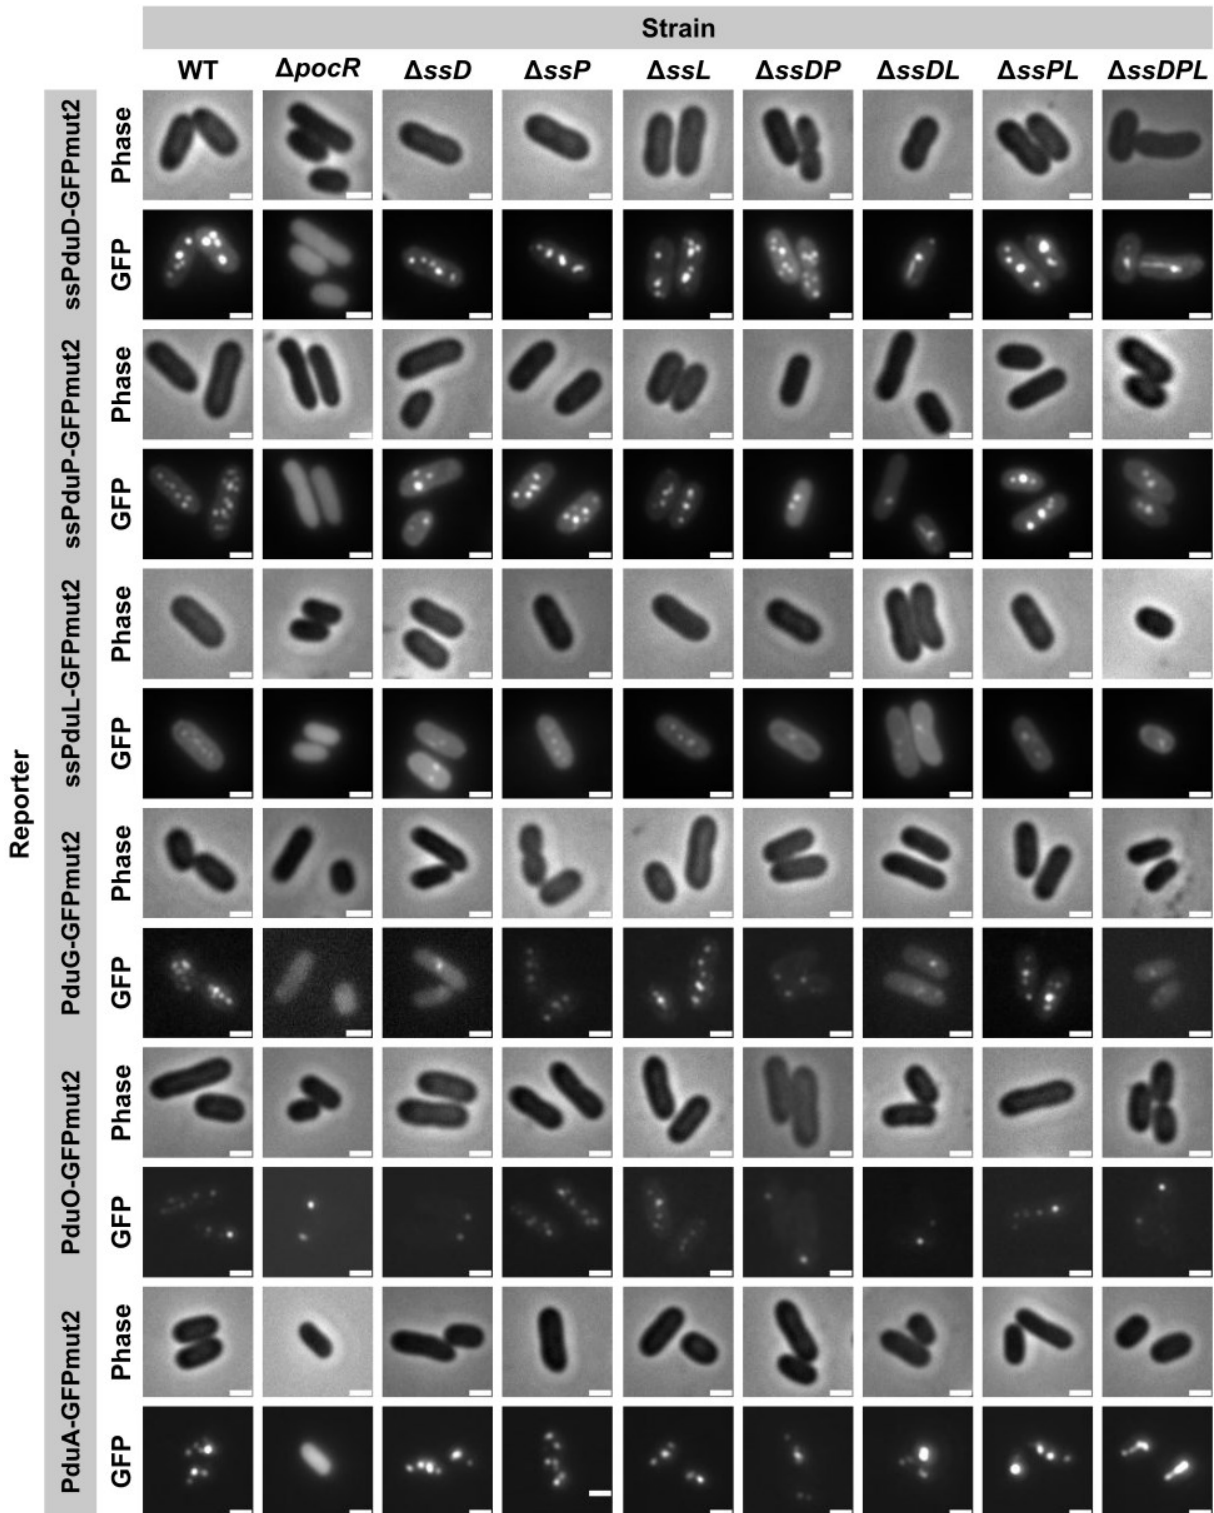

**Supplementary Figure S5.** Optical and fluorescence micrographs of Pdu MCP core and shell proteins and signal sequences fused to GFPmut2. These constructs were expressed in wild type (WT) *S. enterica*, in  $\Delta pocR$ , an assembly-deficient strain in which all MCP formation is abolished, and in the enzymatic signal sequence knockout strains. All scale bars are 1  $\mu\text{m}$ . Similar results were observed across at least three biological replicates of each strain.



**a**

|          |              |                |                |                |                |                |               |                |
|----------|--------------|----------------|----------------|----------------|----------------|----------------|---------------|----------------|
| ssD-GFP  | 3.7 ±<br>0.3 | 4.0 ±<br>0.2   | 3.3 ±<br>0.2   | 2.74 ±<br>0.09 | 3.97 ±<br>0.08 | 2.47 ±<br>0.09 | 2.7 ±<br>0.1  | 1.75 ±<br>0.07 |
| ssP-GFP  | 4.9 ±<br>0.2 | 2.8 ±<br>0.4   | 4.6 ±<br>0.01  | 3.3 ±<br>0.2   | 2.6 ±<br>0.3   | 1.47 ±<br>0.09 | 3.3 ±<br>0.1  | 1.3 ±<br>0.2   |
| ssL-GFP  | 3.1 ±<br>0.2 | 1.72 ±<br>0.04 | 3.0 ±<br>0.3   | 2.7 ±<br>0.3   | 1.0 ±<br>0.1   | 1.18 ±<br>0.06 | 1.9 ±<br>0.1  | 1.10 ±<br>0.03 |
| PduG-GFP | 4.0 ±<br>0.5 | 1.3 ±<br>0.1   | 3.63 ±<br>0.06 | 2.8 ±<br>0.2   | 1.3 ±<br>0.3   | 1.1 ±<br>0.2   | 2.8 ±<br>0.1  | 1.00 ±<br>0.03 |
| PduO-GFP | 3.3 ±<br>0.1 | 1.09 ±<br>0.09 | 3.9 ±<br>0.3   | 2.9 ±<br>0.1   | 1.00 ±<br>0.03 | 1.10 ±<br>0.05 | 2.5 ±<br>0.3  | 1.2 ±<br>0.1   |
| PduA-GFP | 3.8 ±<br>0.4 | 3.1 ±<br>0.4   | 4.0 ±<br>0.6   | 2.9 ±<br>0.1   | 2.7 ±<br>0.1   | 1.8 ±<br>0.1   | 2.5 ±<br>0.1  | 2.1 ±<br>0.1   |
|          | WT           | $\Delta$ ssD   | $\Delta$ ssP   | $\Delta$ ssL   | $\Delta$ ssDP  | $\Delta$ ssDL  | $\Delta$ ssPL | $\Delta$ ssDPL |

**b**

|          |              |                |                |                |                |                |                 |                 |                  |
|----------|--------------|----------------|----------------|----------------|----------------|----------------|-----------------|-----------------|------------------|
| ssD-GFP  | 3.7 ±<br>0.3 | 0.92 ±<br>0.04 | 1.1 ±<br>0.1   | 2.4 ±<br>0.1   | 1.52 ±<br>0.03 | 1.00 ±<br>0.02 | 1.05 ±<br>0.08  | 1.4 ±<br>0.2    | 0.82 ±<br>0.08   |
| PduG-GFP | 4.0 ±<br>0.5 | 1.01 ±<br>0.02 | 0.99 ±<br>0.04 | 1.81 ±<br>0.06 | 1.7 ±<br>0.2   | 0.97 ±<br>0.04 | 1.04 ±<br>0.04  | 1.6 ±<br>0.1    | 0.90 ±<br>0.10   |
| ssM-GFP  | 4.7 ±<br>0.4 | 0.94 ±<br>0.01 | 0.96 ±<br>0.02 | 2.04 ±<br>0.07 | 1.9 ±<br>0.1   | 0.98 ±<br>0.03 | 1.01 ±<br>0.05  | 1.5 ±<br>0.3    | 0.94 ±<br>0.05   |
| PduA-GFP | 3.8 ±<br>0.4 | 3.6 ±<br>0.3   | 3.3 ±<br>0.1   | 3.3 ±<br>0.5   | 2.5 ±<br>0.2   | 3.1 ±<br>0.2   | 2.0 ±<br>0.3    | 1.5 ±<br>0.1    | 1.8 ±<br>0.2     |
|          | WT           | $\Delta$ pduB  | $\Delta$ ssB   | $\Delta$ pduM  | $\Delta$ ssM   | $\Delta$ ssMB  | $\Delta$ ssDPLB | $\Delta$ ssDPLM | $\Delta$ ssDPLMB |

**Supplementary Figure S6.** Means and standard deviations of GFP puncta per cell for (a) strains and reporters shown in the main figure 3b heatmap and (b) strains and reporters shown in the main figures 4b and 5b heatmaps. The values shown in this figure are the means and standard deviations over three biological replicates of at least 30 cells each and are not normalized to wild type puncta counts.

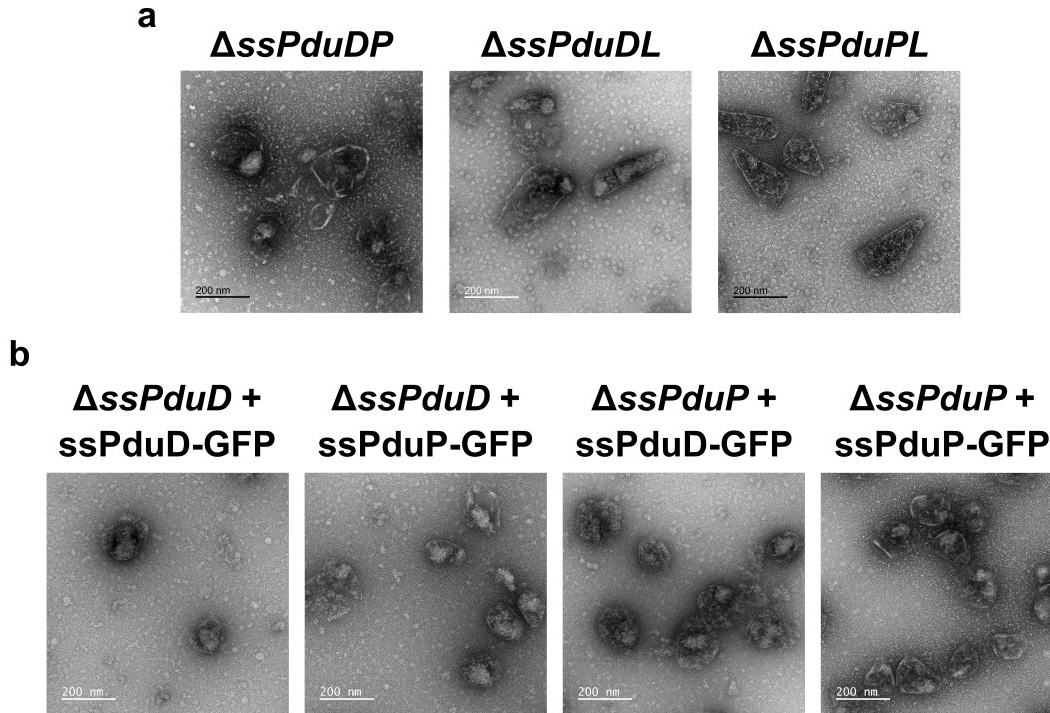

**Supplementary Figure S7.** Transmission electron micrographs of purified MCPs from (a) strains with two enzymatic signal sequences knocked out and (b)  $\Delta ssPduD$  and  $\Delta ssPduP$  complemented with overexpressed ssPduD-GFP and ssPduP-GFP. These images are representative of multiple images taken of the same sample, but due to time constraints, cost constraints, and a large number of samples, transmission electron micrographs were only taken of one biological replicate.

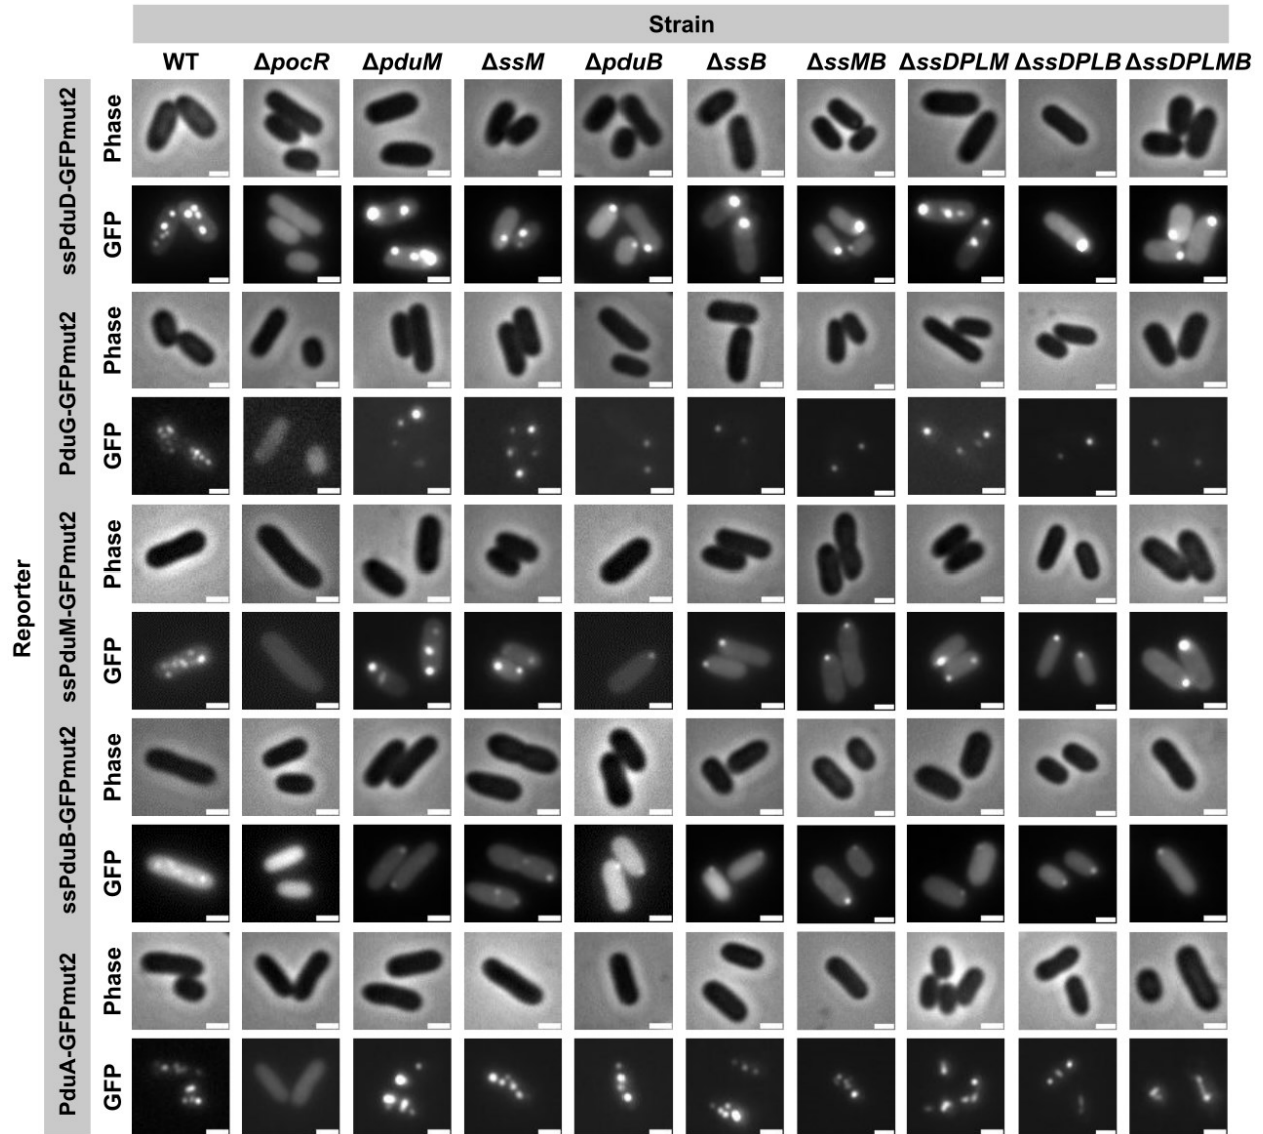

**Supplementary Figure S8.** Optical and fluorescence micrographs of Pdu MCP core and shell proteins and signal sequences fused to GFPmut2. These constructs were expressed in wild type (WT) *S. enterica*, in  $\Delta pocR$ , an assembly-deficient strain in which all MCP formation is abolished, and in the structural and enzymatic + structural signal sequence knockout strains. All scale bars are 1  $\mu$ m. Similar results were observed across at least three biological replicates of each strain.

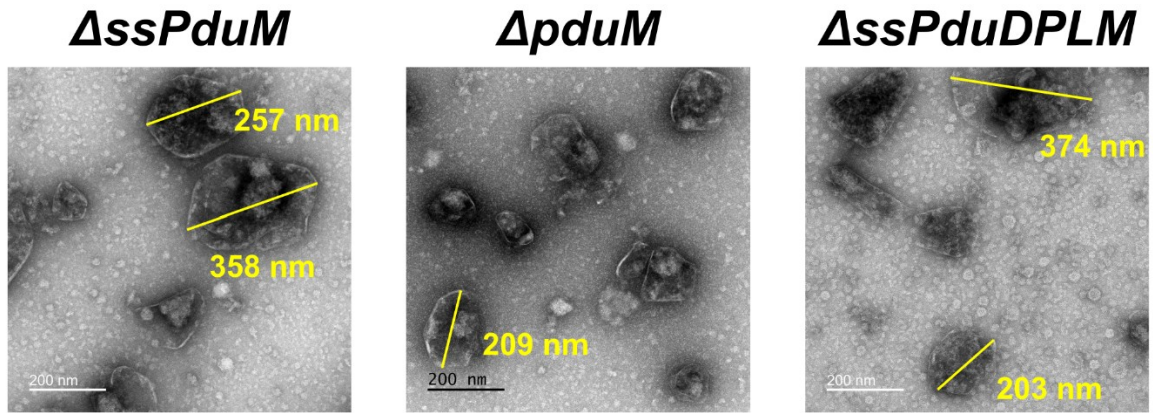

**Supplementary Figure S9.** Transmission electron micrographs of purified  $\Delta ssPduM$ ,  $\Delta pduM$ , and  $\Delta ssPduDPLM$  MCPs noting the sizes of MCPs over 200 nm in diameter. These images are representative of multiple images taken of the same sample, but due to time constraints, cost constraints, and a large number of samples, transmission electron micrographs were taken of only one biological replicate.

## Supplementary References

1. Jumper, J. *et al.* Highly accurate protein structure prediction with AlphaFold. *Nature* **596**, 583–589 (2021).
2. Varadi, M. *et al.* AlphaFold Protein Structure Database: massively expanding the structural coverage of protein-sequence space with high-accuracy models. *Nucleic Acids Res.* **50**, D439–D444 (2022).
3. Pettersen, E. F. *et al.* UCSF Chimera—A visualization system for exploratory research and analysis. *J. Comput. Chem.* **25**, 1605–1612 (2004).
